# Supplementary material
Source: Springer Nature journal article supplement (https://www.springermedizin.de/resource/supplementary/12877_2009_322_MOESM3_ESM.pdf/9439384)
Supplement: MOESM3 [file 9439384]

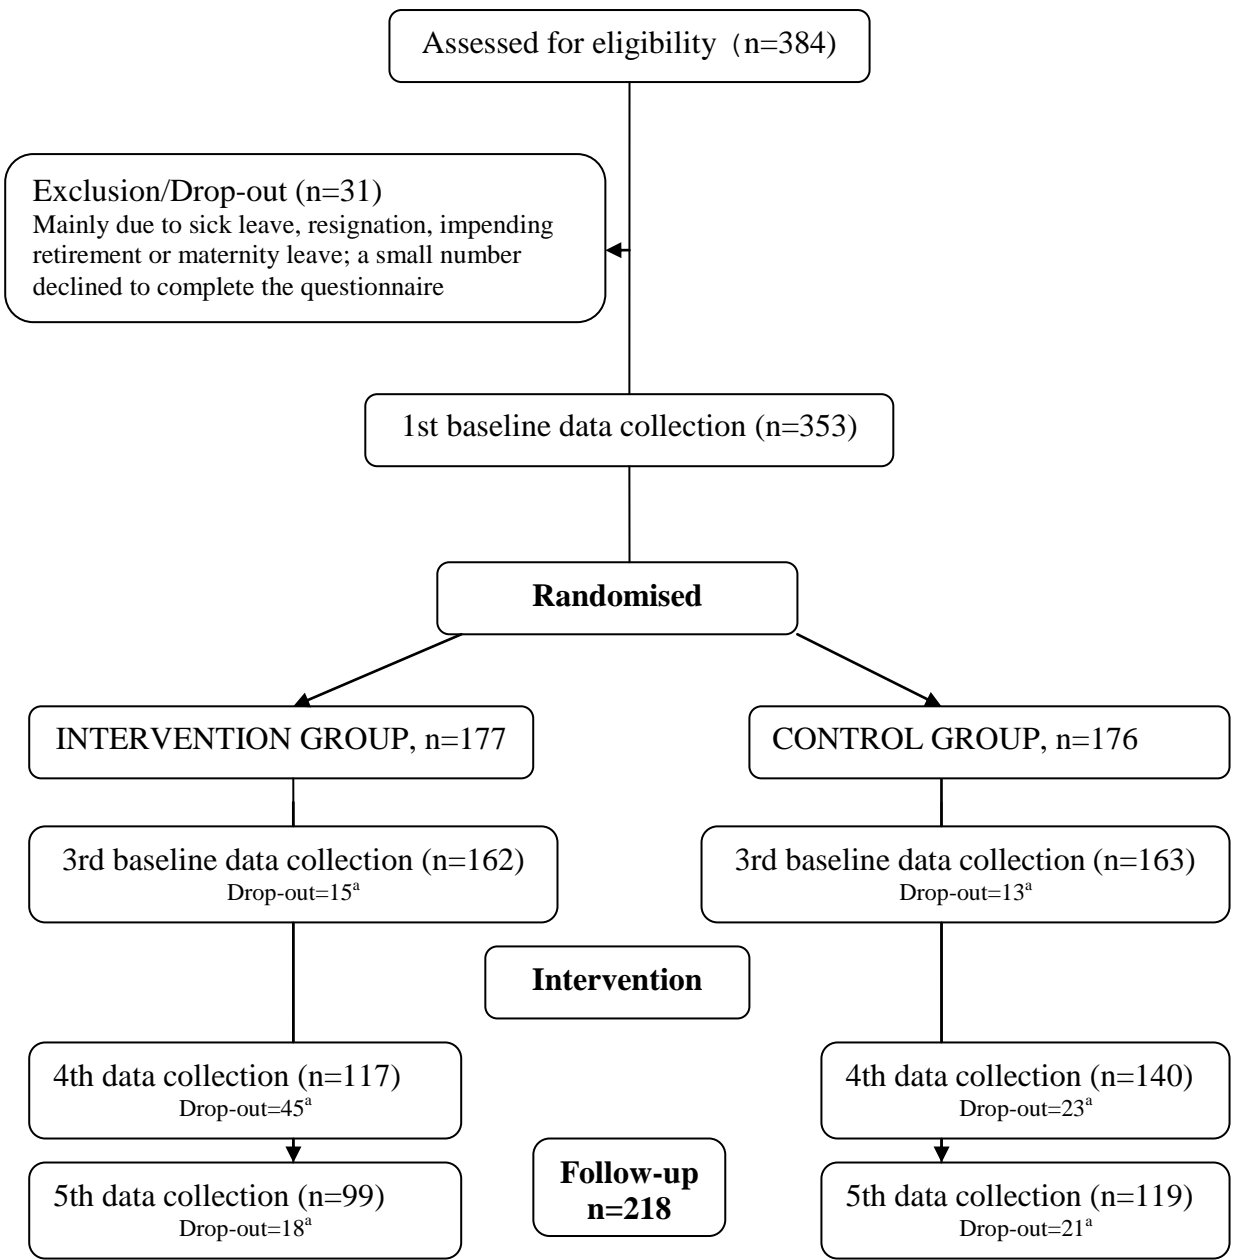

<sup>a</sup> Drop-out after 1st baseline (n=135) was mainly due to staff resignations (62% of drop-out), but also to maternity/parental leave (12%), long-term sickness leave (4%), retirement (2%), moved to protected-environment unit (1%) or died (1%); while 18% failed to complete baseline and final questionnaires.
